# Supplementary material for: Prevalence of adiposity and its association with sleep duration, quality, and timing among 9–12-year-old children in Guangzhou, China
Source: PubMed Central journal article supplement (PMC5608611; doi:10.1016/j.je.2016.11.003), 2017-06-13
Supplement: mmc1.pdf [file mmc1.pdf]

**eFigure 1.** Frequency polygon of sleep duration in early adolescents (n=5518). The solid line indicates the median of sleep duration and the dotted lines indicate 1 standard deviation.

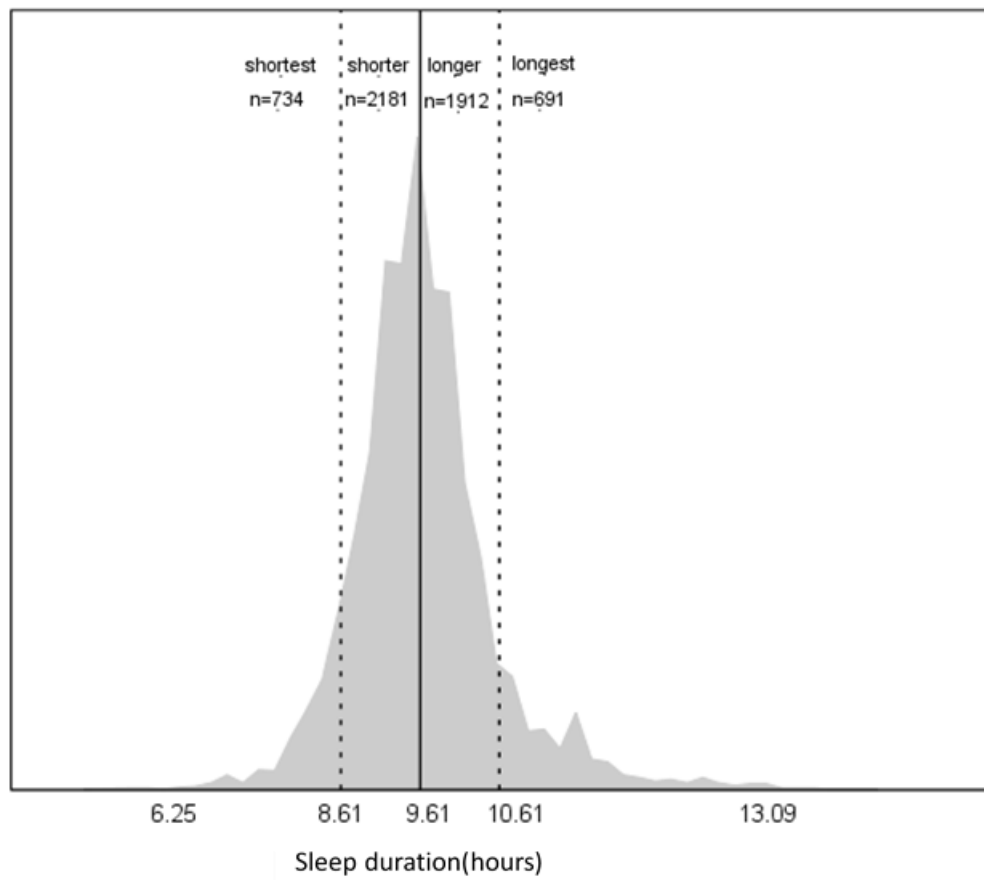

**eTable 1.** Prevalence of overweight and obesity stratified by gender using other criteria among 9–12 aged children in Guangzhou, China

|                         | Total      | Boys       | Girls     | P value          |
|-------------------------|------------|------------|-----------|------------------|
|                         | n (%)      | n (%)      | n (%)     |                  |
| Overweight <sup>a</sup> | 534 (9.5)  | 392 (12.9) | 142 (5.5) | <b>&lt;0.001</b> |
| Obesity <sup>a</sup>    | 303 (5.5)  | 220 (7.2)  | 83 (3.2)  | <b>&lt;0.001</b> |
| Overweight <sup>b</sup> | 675 (12.0) | 444 (14.6) | 231 (9.0) | <b>&lt;0.001</b> |
| Obesity <sup>b</sup>    | 187 (3.3)  | 148 (4.9)  | 29 (1.5)  | <b>&lt;0.001</b> |

<sup>a</sup> Calculated using Working Group on Obesity in China criterion.

<sup>b</sup> Calculated using International Obesity Task Force criterion.

**eTable 2.** Associations between bedtime (categorized) and adiposity measures for the unadjusted and adjusted linear multilevel regression models

|                                   |                       | Unadjusted model<br>(model 1) * |              | Individual<br>model (model 2) ** | factor-adjusted | Fully adjusted model<br>(model 3) *** |             |
|-----------------------------------|-----------------------|---------------------------------|--------------|----------------------------------|-----------------|---------------------------------------|-------------|
|                                   |                       | Coefficient (95% CI)            | P value      | Coefficient (95% CI)             | P value         | Coefficient (95% CI)                  | P value     |
| BMI z-score (n=5518) <sup>a</sup> |                       |                                 |              |                                  |                 |                                       |             |
| Bedtime                           | Before 21:45min       | 0.00 (reference)                |              | 0.00 (reference)                 |                 | 0.00 (reference)                      |             |
|                                   | 21:45min–<br>22:15min | -0.02 (-0.11, 0.06)             | 0.59         | 0.04 (-0.05, 0.13)               | 0.34            | 0.04 (-0.06, 0.15)                    | 0.43        |
|                                   | After 22:15min        | <b>0.09 (0.02,0.17)</b>         | <b>0.02</b>  | <b>0.13 (0.05, 0.21)</b>         | <b>0.002</b>    | <b>0.12 (0.02,0.22)</b>               | <b>0.02</b> |
| WC (n=5518) <sup>a</sup>          |                       |                                 |              |                                  |                 |                                       |             |
| Bedtime                           | Before 21:45min       | 0.00 (reference)                |              | 0.00 (reference)                 |                 | 0.00 (reference)                      |             |
|                                   | 21:45min–<br>22:15min | <b>0.75 (0.24,1.27)</b>         | <b>0.004</b> | 0.32 (-0.17,0.80)                | 0.20            | 0.23 (-0.36,0.81)                     | 0.45        |

|                            |                       |                            |                  |                            |                  |                         |             |
|----------------------------|-----------------------|----------------------------|------------------|----------------------------|------------------|-------------------------|-------------|
|                            | After 22:15min        | <b>1.60 (1.11,2.08)</b>    | <b>&lt;0.001</b> | <b>0.79 (0.33,1.25)</b>    | <b>&lt;0.001</b> | <b>0.64 (0.08,1.20)</b> | <b>0.02</b> |
| WHtR (n=5518) <sup>a</sup> |                       |                            |                  |                            |                  |                         |             |
| Bedtime                    | Before 21:45min       | 0.00 (reference)           |                  | 0.00 (reference)           |                  | 0.00 (reference)        |             |
|                            | 21:45min–<br>22:15min | 0.002 (–0.001, 0.005)      | 0.21             | 0.001 (–0.002, 0.004)      | 0.37             | 0.001 (–0.003, 0.004)   | 0.75        |
|                            | After 22:15min        | <b>0.007 (0.004, 0.01)</b> | <b>&lt;0.001</b> | <b>0.005 (0.002,0.007)</b> | <b>0.002</b>     | 0.003 (–0.000, 0.007)   | 0.06        |
| BF% (n=2795) <sup>a</sup>  |                       |                            |                  |                            |                  |                         |             |
| Bedtime                    | Before 21:45min       | 0.00 (reference)           |                  | 0.00 (reference)           |                  | 0.00 (reference)        |             |
|                            | 21:45min–<br>22:15min | 0.42 (–0.33,1.17)          | 0.27             | 0.23 (–0.37,0.84)          | 0.45             | 0.14 (–0.57,0.85)       | 0.69        |
|                            | After 22:15min        | –1.26 (–0.88,0.63)         | 0.75             | <b>0.64 (0.03,1.26)</b>    | <b>0.04</b>      | 0.55 (–0.18,1.27)       | 0.14        |

BF%, body fat percentage; BMI, body mass index; CI, confidence interval; WC, waist circumference; WHtR, waist-to-height ratio;

Significant P-values ( $\alpha=0.05$ ) are bolded.

\*Model 1: unadjusted

\*\*Model 2: adjusted for age and gender

\*\*\*Model 3: adjusted for age, gender, and physical activities, parental education level, average income monthly, and sleep duration

<sup>a</sup> Number of participants included in the fully adjusted model
